# Supplementary material
Source: PubMed Central journal article supplement (PMC3854003)
Supplement: NIHMS517593-supplement-1.pdf [file NIHMS517593-supplement-1.pdf]

# **Influence of electron dose rate on electron counting images recorded with the k2 camera**

Xueming Li<sup>1</sup>, Shawn Zheng<sup>2</sup>, Kiyoshi Egami<sup>1,3</sup>,

David A. Agard<sup>1,2</sup> and Yifan Cheng<sup>1</sup>

<sup>1</sup>The Keck Advanced Microscopy Laboratory, Department of Biochemistry and Biophysics, <sup>2</sup>The Howard Hughes Medical Institute, <sup>3</sup>Graduate Group in Biophysics, University of California San Francisco, 600 16th Street, San Francisco, CA 94158

Correspondence: [Agard@msg.ucsf.edu](mailto:Agard@msg.ucsf.edu) and [ycheng@ucsf.edu](mailto:ycheng@ucsf.edu)

## **Supporting Information Inventory:**

**Figure S1.** Line profiles of knife-edge image recorded with the K2 Summit at different dose rate.

**Figure S2.** Simulations suggest possible options to improve the linearity of DCE curve.

**Figure S3.** Fourier Shell Correlations of 3D reconstructions.

## SUPPLEMENTARY FIGURES

Figure S1. Line profiles of knife-edge image recorded with the K2 Summit at different dose rate.

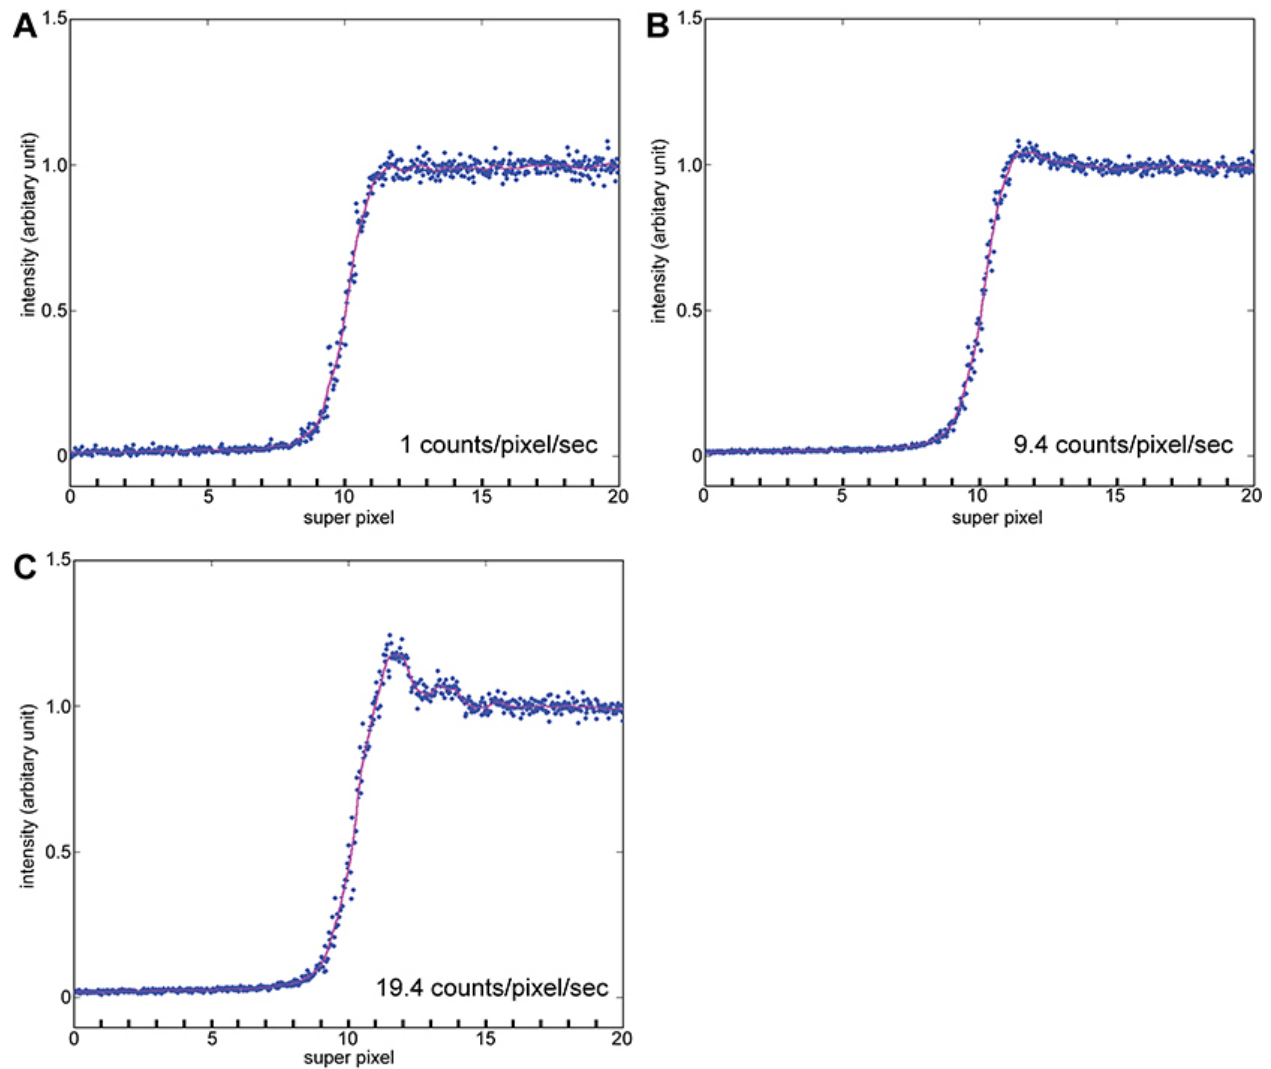

Knife-edge images were recorded using K2 Summit operated in super-resolution counting mode at different dose rates of 1, 9.4 and 19.4 counts/pixel/sec. Line profiles are plotted in A, B and C. Note that the coincidence losses at bright enhances the contrast of the edge.

**Figure S2. Simulations suggest possible options to improve the linearity of DCE curve.**

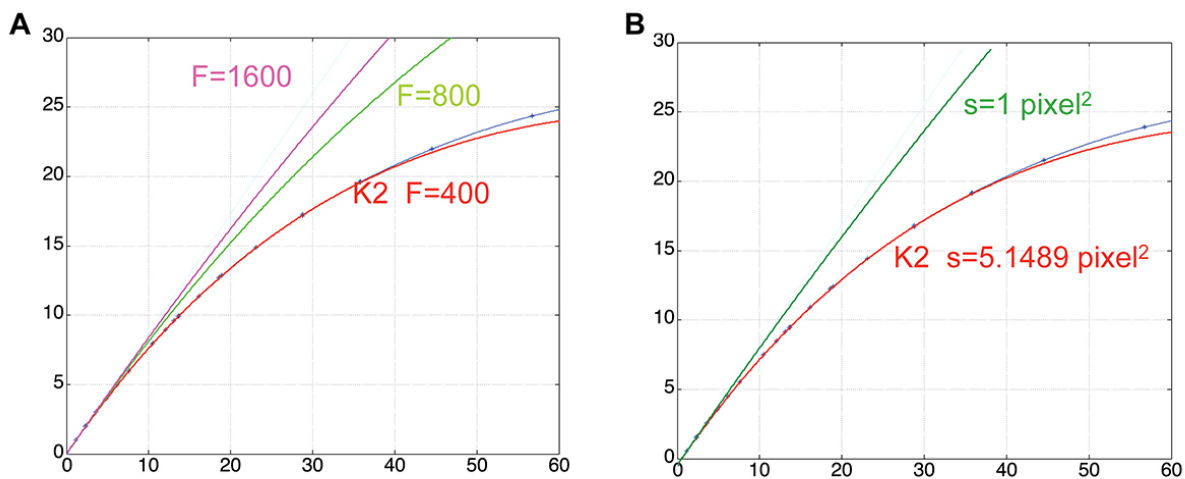

DCE curves were simulated based on formula (4) in the main text, using parameters determined by fitting the experimental curves, i.e.  $QE = 0.8656$ ,  $s = 5.1459 \text{ pixel}^2$  and  $F = 400 \text{ frame/sec}$ . (A) A higher frame rate, such as 800 or 1600 frames/sec, would improve the linearity of the DCE curve. (B) A smaller  $s$ , which corresponds to the largest area within which overlapping primary events during a single frame were lost, would also improve the linearity of the DCE curve.

**Figure S3. Fourier Shell Correlations of 3D reconstructions**

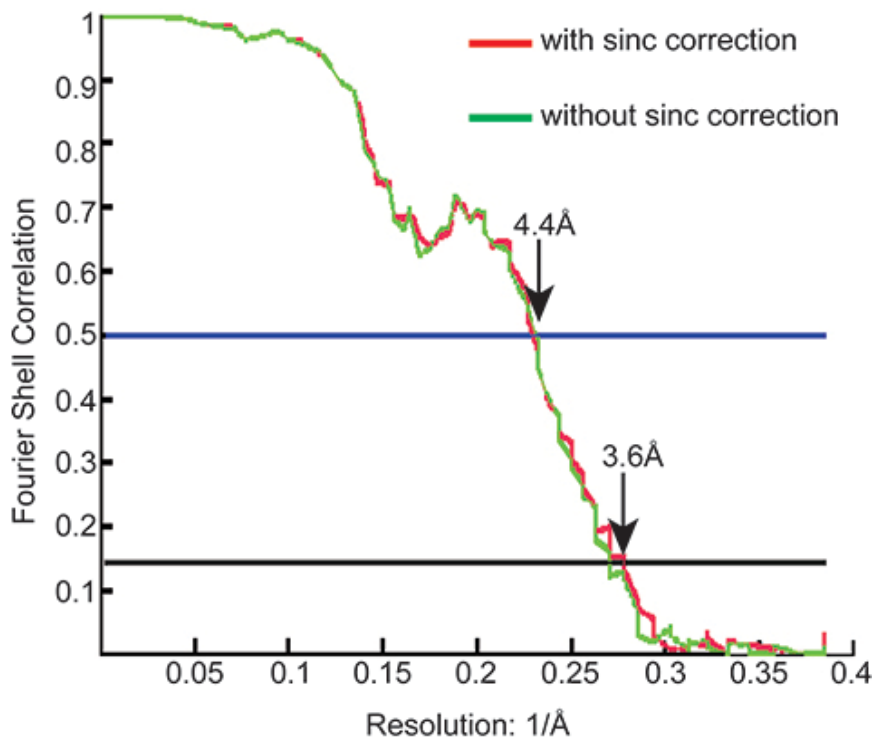

Fourier shell correction of 3D reconstructions with (red) and without (green) amplitude correction.
